# Supplementary material for: Delivery of tacrolimus with cationic lipid-assisted nanoparticles for ulcerative colitis therapy
Source: Royal Society of Chemistry journal article supplement (doi:10.1039/c8bm00463c), 2018-01-01
Supplement: c8bm00463c1.pdf [file c8bm00463c1.pdf]

## Supporting Information

# Delivery of tacrolimus with cationic lipid-assisted nanoparticles for ulcerative colitis therapy

Ji-Long Wang,<sup>‡a</sup> Yun-Jiu Gan,<sup>‡b</sup> Shoaib Iqbal,<sup>a</sup> Wei Jiang,<sup>b</sup> You-Yong Yuan,<sup>c,d</sup> and Jun Wang<sup>\*a,b,c,d,e</sup>

<sup>a</sup>School of Life Sciences, University of Science and Technology of China, Hefei, Anhui 230027, P.R. China

<sup>b</sup>Hefei National Laboratory for Physical Sciences at the Microscale, University of Science and Technology of China, Hefei, Anhui 230027, P.R. China

<sup>c</sup>Institutes for Life Sciences and School of Medicine, South China University of Technology, Guangzhou, Guangdong 510006, P.R. China

<sup>d</sup>National Engineering Research Center for Tissue Restoration and Reconstruction, South China University of Technology, Guangzhou, Guangdong 510006, P.R. China

<sup>e</sup>Research Institute for Food Nutrition and Human Health, South China University of Technology, Guangzhou 510641, P.R. China

<sup>‡</sup>These two authors contributed equally to this work.

Corresponding author

\*Email: mcjwang@scut.edu.cn (J. Wang)

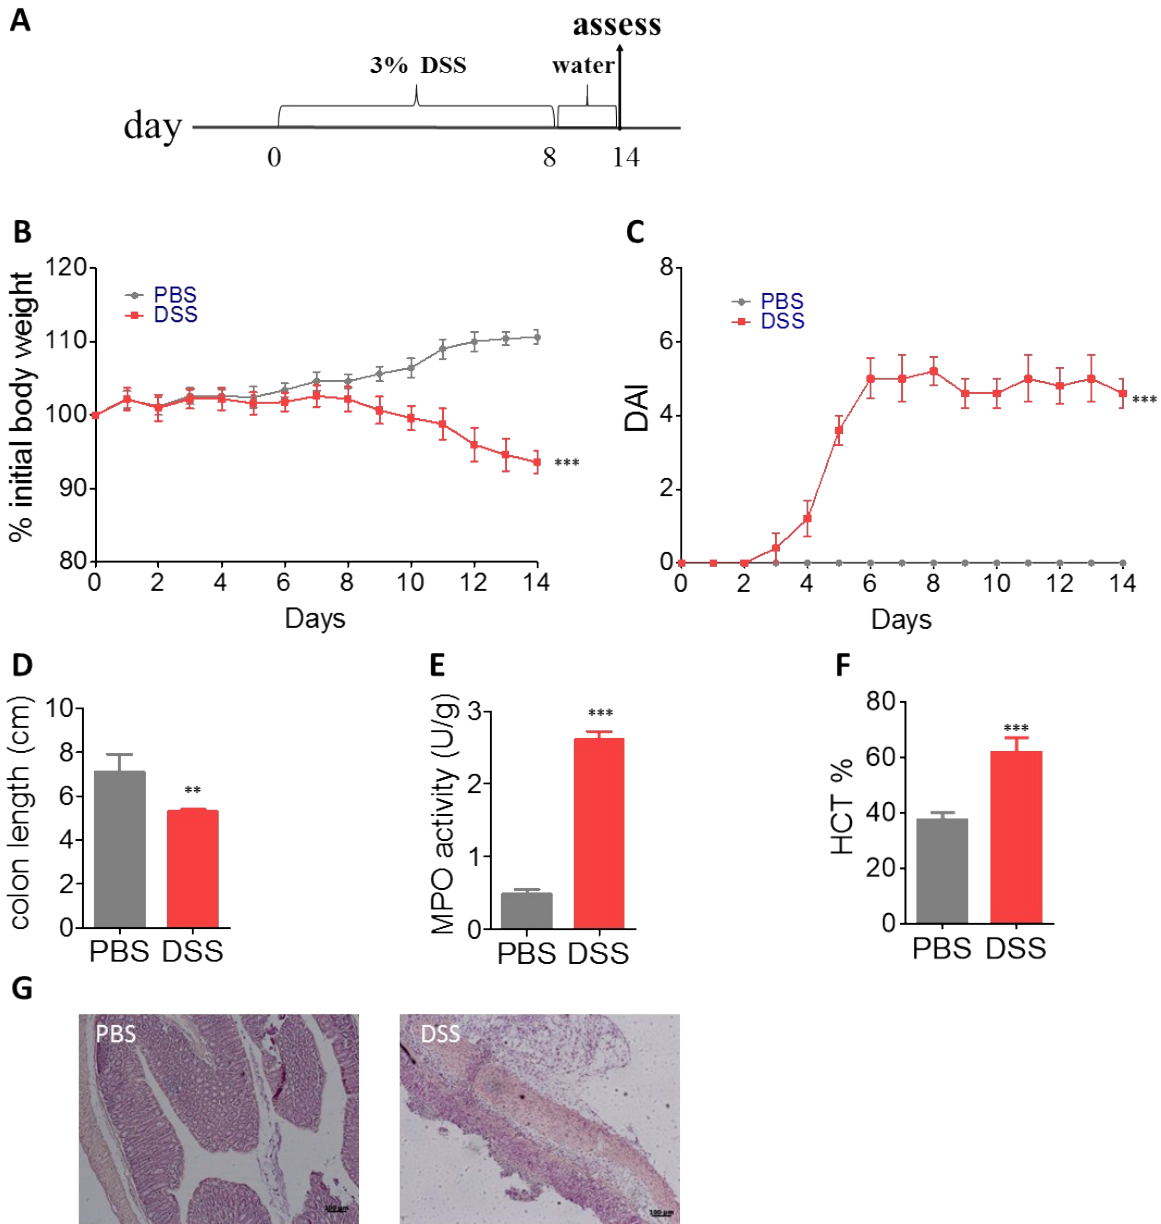

**Figure S1.** (A) Schematic representation of the experimental design. C57BL/6 mice were treated with 3% DSS in drinking water on days 0-8. Mice were sacrificed for analysis on day 14. (B) Body weight in DSS treatment mice and control mice. n = 5. (C) Changes in DAI. DAI is the summation of the stool consistency index (0 – 3), fecal bleeding index (0 – 3), and weight loss index (0 – 4). n = 5. (D) Measurement of the colon. n = 5. (E) MPO activity of the treatment and control mice. n = 5. (F) Hematocrit in DSS treatment and control mice on day 8 of the

experiment. n = 5. (G) H&E stained colon sections for histopathological analyses. Scale bar 100  $\mu$ m.

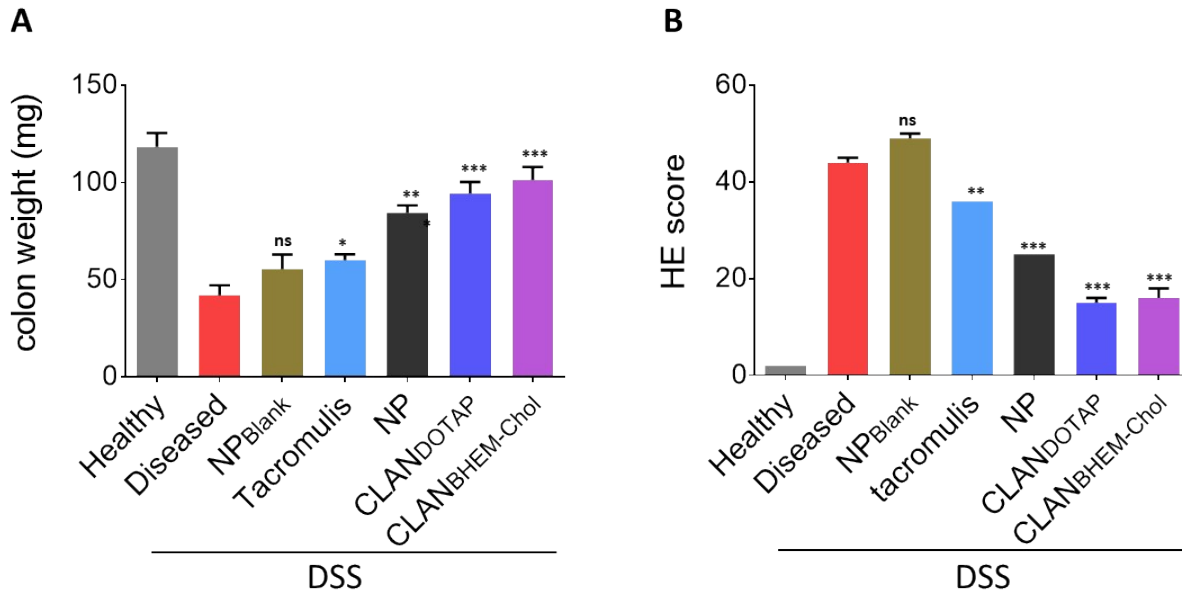

**Figure S2.** (A) Weight of the colon tissue from the colitis mice after treatment. n = 5 mice per group. (B) H&E scores from histopathological analyses. \*\* P < 0.01, \*\*\* P < 0.001 vs Diseased. n = 5 mice per group.
